# Supplementary material for: Manufacture of a Potential Antifungal Ingredient Using Lactic Acid Bacteria from Dry-Cured Sausages
Source: MDPI journal article supplement (doi:10.3390/foods12071427), 2023-03-27
Supplement: s1 [file s1]

*Article*

# **Manufacture of a potential antifungal ingredient using lactic acid bacteria from dry-cured sausages**

**Tiago de Melo Nazareth <sup>1,\*</sup>, Jorge Calpe <sup>1</sup>, Carlos Luz <sup>1</sup>, Jordi Mañes <sup>1</sup>, Giuseppe Meca <sup>1</sup>**

<sup>1</sup> Department of Food Science and Toxicology, Faculty of Pharmacy, University of Valencia, Ave. Vicent Andrés Estellés s/n, 46100 Burjassot, Spain

\* Correspondence: tiago@uv.es; Tel.: +34963544959

**Table S1.** Elaboration of meat broths for fermentation for lactic acid bacteria.

| <b>Ingredient</b>     | <b><i>Concentration (g/L)</i></b> |            |            |             |             |
|-----------------------|-----------------------------------|------------|------------|-------------|-------------|
|                       | <b>MB2</b>                        | <b>MB4</b> | <b>MB8</b> | <b>MB10</b> | <b>MRSb</b> |
| Dextrose              | 20.00                             | 20.00      | 20.00      | 20.00       | 20.00       |
| Meat extract          | -                                 | -          | -          | -           | 8.00        |
| Yeast extract         | -                                 | -          | -          | -           | 4.00        |
| Peptone               | 10.00                             | 10.00      | 10.00      | 10.00       | 10.00       |
| Sodium acetate        | 5.00                              | 5.00       | 5.00       | 5.00        | 5.00        |
| Dipotassium phosphate | 2.00                              | 2.00       | 2.00       | 2.00        | 2.00        |
| Ammonium citrate      | 2.00                              | 2.00       | 2.00       | 2.00        | 2.00        |
| Magnesium sulfate     | 0.20                              | 0.20       | 0.20       | 0.20        | 0.20        |
| Manganese sulfate     | 0.05                              | 0.05       | 0.05       | 0.05        | 0.05        |
| Tween (mL/L)          | 1.00                              | 1.00       | 1.00       | 1.00        | 1.00        |
| Lyophilized pork loin | 2.00                              | 4.00       | 8.00       | 10.00       | -           |

**Table S2.** Antifungal activity of formulated meat broths (MB) and MRS broth fermented by *Pediococcus pentosaceus* C15 during 24, 48, and 72 h at 37 °C. The bacterial-free supernatant (BFS) was freeze-dried, resuspended at a concentration of 500 g/L, and tested against six toxigenic fungi.

| Fungal strain                   | BFS of <i>Pediococcus pentosaceus</i> C15<br>(500 g/L) |      |      |      |      |      |
|---------------------------------|--------------------------------------------------------|------|------|------|------|------|
|                                 | 24 h                                                   |      | 48 h |      | 72 h |      |
|                                 | MRSb                                                   | MB10 | MRSb | MB10 | MRSb | MB10 |
| <i>Aspergillus flavus</i>       | +                                                      | -    | ++   | ++   | +    | +    |
| <i>Aspergillus parasiticus</i>  | +                                                      | -    | ++   | +    | +    | +    |
| <i>Penicillium commune</i>      | ++                                                     | +    | +++  | +++  | +++  | ++   |
| <i>Penicillium griseofulvum</i> | ++                                                     |      | +++  | +++  | ++   | ++   |
| <i>Penicillium nordicum</i>     | ++                                                     | +    | +++  | +++  | ++   | ++   |
| <i>Penicillium verrucosum</i>   | ++                                                     | +    | +++  | +++  | +++  | ++   |

(+) Represents a growth inhibition halo of 0.2 cm; (++) represents a growth inhibition halo of between 0.2 to 0.4 cm; (+++) represents a growth inhibition halo greater than 0.4 cm.

**Table S3.** Identification of Volatile Organic Compounds (VOCs) of the fermented Meat Broth 10, with retention time, chemical class, calculated LRI (LRI exp.), and references.

| Nº | Rt    | Compound               | Class    | Identif. | LRI exp. | LRI lit. | Reference |
|----|-------|------------------------|----------|----------|----------|----------|-----------|
| 1  | 3.11  | Acetic acid            | Acid     | MS       |          |          |           |
| 2  | 4.55  | Pyrazine, methyl-      | Pyrazine | MS + LRI | 805      | 807      | [1]       |
| 3  | 5.78  | 2-Heptanone            | Ketone   | MS + LRI | 859      | 859      | [2]       |
| 4  | 6.25  | Heptanal               | Aldehyde | MS + LRI | 880      | 882      | [3]       |
| 5  | 6.37  | Pyrazine, 2,5-dimethyl | Pyrazine | MS + LRI | 885      | 883      | [4]       |
| 6  | 8.71  | 2-Octanone             | Ketone   | MS + LRI | 980      | 984      | [5]       |
| 7  | 8.89  | Octanal                | Aldehyde | MS + LRI | 988      | 991      | [6]       |
| 8  | 8.97  | 2-Octanol              | Alcohol  | MS + LRI | 991      | 990      | [7]       |
| 9  | 10.77 | Decane, 2-methyl       | Alkane   | MS + LRI | 1063     | 1061     | [8]       |
| 10 | 11.02 | Benzeneacetaldehyde    | Aldehyde | MS + LRI | 1073     | 1071     | [9]       |
| 11 | 11.19 | 1-Octanol              | Alcohol  | MS + LRI | 1080     | 1079     | [10]      |
| 12 | 11.28 | 2-Nonanone             | Ketone   | MS + LRI | 1083     | 1083     | [11]      |
| 13 | 11.42 | Nonanal                | Aldehyde | MS + LRI | 1089     | 1089     | [4]       |
| 14 | 11.62 | 2-Nonanol              | Alcohol  | MS + LRI | 1097     | 1098     | [12]      |
| 15 | 11.69 | Undecane               | Alkane   | MS + Std | 1100     |          |           |
| 16 | 13.43 | Phenylethyl alcohol    | Alcohol  | MS       | 1172     |          |           |
| 17 | 13.60 | 1-Nonanol              | Alcohol  | MS + LRI | 1180     | 1180     | [13]      |
| 18 | 15.49 | Nonanoic acid          | Acid     | MS + LRI | 1261     | 1263     | [3]       |
| 19 | 15.82 | 2-Decenal              | Aldehyde | MS + LRI | 1275     | 1270     | [14]      |
| 20 | 15.88 | 1-Decanol              | Alcohol  | MS + LRI | 1278     | 1279     | [15]      |
| 21 | 16.11 | 2-Undecanone           | Ketone   | MS + LRI | 1289     | 1273     | [3]       |
| 22 | 16.27 | 2-Undecanol            | Alcohol  | MS + LRI | 1296     | 1294     | [16]      |
| 23 | 18.50 | Dodecanal              | Aldehyde | MS + LRI | 1398     | 1405     | [17]      |
| 24 | 20.45 | 2-Tridecanone          | Ketone   | MS + LRI | 1493     | 1497     | [18]      |

## References:

1. Lu, C.-Y.; Hao, Z.; Payne, R.; Ho, C.-T., Effects of water content on volatile generation and peptide degradation in the Maillard reaction of glycine, diglycine, and triglycine, **J. Agric. Food Chem.**, 2005, 53, 16, 6443-6447, <https://doi.org/10.1021/jf050534p>
2. Pino, J.A.; Marbot, R.; Bello, A., Volatile compounds of *Psidium salutare* (H.B.K.) Berg. fruit, **J. Agric. Food Chem.**, 2002, 50, 18, 5146-5148, <https://doi.org/10.1021/jf0116303>
3. Ziegenbein, F.C.; Hanssen, H.-P.; König, W.A., Secondary metabolites from *Ganoderma lucidum* and *Spongiporus leucomallellus*, **Phytochemistry**, 2006, 67, 2, 202-211, <https://doi.org/10.1016/j.phytochem.2005.10.025>
4. Pino, J.; Almora, K.; Marbot, R., Volatile components of papaya (*Carica papaya* L., maradol variety) fruit, **Flavour Fragr. J.**, 2003, 18, 6, 492-496, <https://doi.org/10.1002/ffj.1248>
5. Sampaio, T.S.; Nogueira, P.C.L., Volatile components of mangaba fruit (*Hancornia speciosa* Gomes) at three stages of maturity, **Food Chem.**, 2006, 95, 4, 606-610, <https://doi.org/10.1016/j.foodchem.2005.01.038>
6. Xian Q.; Chen H.; Zou H.; Yin D., Chemical composition of essential oils of two submerged macrophytes, *Ceratophyllum demersum* L. and *Vallisneria spiralis* L., **Flavour Fragr. J.**, 2006, 21, 3, 524-526, <https://doi.org/10.1002/ffj.1588>
7. Nickavar B.; Kamalinejad M.; Mohandesi S., Comparison of the components of the essential oils from leaves and fruits of *Grammosciadium platycarpum*, **Chem. Nat. Compd.**, 2006, 42, 6, 686-688, <https://doi.org/10.1007/s10600-006-0252-x>
8. Pavlovic, M.; Tzakou, O.; Petrakis, P.V.; Couladis, M., The essential oil of *Hypericum perforatum* L., *Hypericum tetrapterum* Fries and *Hypericum olympicum* L. growing in Greece, **Flavour Fragr. J.**, 2006, 21, 1, 84-87, <https://doi.org/10.1002/ffj.1521>
9. Bredie, W.L.P.; Mottram, D.S.; Guy, R.C.E., Effect of temperature and pH on the generation of flavor volatiles in extrusion cooking of wheat flour, **J. Agric. Food Chem.**, 2002, 50, 5, 1118-1125, <https://doi.org/10.1021/jf0111662>
10. Bylaite, E.; Meyer, A.S., Characterisation of volatile aroma compounds of orange juices by three dynamic and static headspace gas chromatography techniques, **Eur. Food Res. Technol.**, 2006, 222, 1-2, 176-184, <https://doi.org/10.1007/s00217-005-0141-8>
11. Cardeal, Z.L.; da Silva, M.D.R.G.; Marriott, P.J., Comprehensive two-dimensional gas chromatography/mass spectrometric analysis of pepper volatiles, **Rapid Commun. Mass Spectrom.**, 2006, 20, 19, 2823-2836, <https://doi.org/10.1002/rcm.2665>
12. Demetzos, C.; Angelopoulou, D.; Perdetzoglou, D., A comparative study of the essential oils of *Cistus salviifolius* in several populations of Crete (Greece), **Biochem. Syst. Ecol.**, 2002, 30, 7, 651-665, [https://doi.org/10.1016/S0305-1978\(01\)00145-4](https://doi.org/10.1016/S0305-1978(01)00145-4)
13. Gocmen, D.; Gurbuz, O.; Rouseff, R.L.; Smoot, J.M.; Dagdelen, A.F., Gas chromatographic-olfactometric characterization of aroma active compounds in sun-dried and vacuum-dried tarhana, **Eur. Food Res. Technol.**, 2004, 218, 6, 573-578, <https://doi.org/10.1007/s00217-004-0913-6>
14. Zhao J.Y.; Liu J.M.; Zhang X.Y.; Liu Z.J.; Tsering T.; Zhong Y.; Nan P., Chemical composition of the volatiles of three wild *Bergenia* species from western China, **Flavour Fragr. J.**, 2006, 21, 3, 431-434, <https://doi.org/10.1002/ffj.1689>
15. Mahattanatawee, K.; Goodner, K.L.; Baldwin, E.A., Volatile constituents and character impact compounds of selected Florida's tropical fruit, **Proc. Fla. State Hort. Soc.**, 2005, 118, 414-418
16. Viana, F.A.; Andrade-Neto, M.; Pouliquen, Y.B.M.; Lucien, V.G., Chemical composition of the essential oil from roots of *Philodendron acutatum* Schott., **J. Essent. Oil Res.**, 2002, 14, 3, 172-174, <https://doi.org/10.1080/10412905.2002.9699814>

17. Kukic J.; Petrovic S.; Pavlovic M.; Couladis M.; Tzakou O.; Niketic M., Composition of essential oil of *Stachys alpina* L. ssp *dinarica* Murb., **Flavour Fragr. J.**, 2006, 21, 3, 539-542, <https://doi.org/10.1002/ffj.1684>
18. Benkaci-Ali, F.; Baaliouamer, A.; Meklati, B.Y.; Chemat, F., Chemical composition of seed essential oils from Algerian *Nigella sativa* extracted by microwave and hydrodistillation, **Flavour Fragr. J.**, 2007, 22, 2, 148-153, <https://doi.org/10.1002/ffj.1773>
